# Supplementary material for: Influence of Oxidative Stress Biomarkers and Genetic Polymorphisms on the Clinical Severity of Hydroxyurea-Free Senegalese Children with Sickle Cell Anemia
Source: MDPI journal article supplement (doi:10.3390/antiox9090863), 2020-09-14
Supplement: s1 [file s1]

**Supplemental data 3: Biomarkers of oxidative stress for the 301 patients with SCA according to the main clinical complications on the last 2 years**

|                                         | Osteonecrosis |              |          | Sepsis        |              |          | Stroke        |               |          | Acute splenic sequestration |              |          | Osteomyelitis |               |          |
|-----------------------------------------|---------------|--------------|----------|---------------|--------------|----------|---------------|---------------|----------|-----------------------------|--------------|----------|---------------|---------------|----------|
|                                         | No<br>n = 292 | Yes<br>n = 9 | <i>p</i> | No<br>n = 295 | Yes<br>n = 6 | <i>p</i> | No<br>n = 289 | Yes<br>n = 12 | <i>p</i> | No<br>n = 293               | Yes<br>n = 8 | <i>p</i> | No<br>n = 286 | Yes<br>n = 15 | <i>p</i> |
| <b><u>Oxidative stress products</u></b> |               |              |          |               |              |          |               |               |          |                             |              |          |               |               |          |
| AOPP (μmol/L)                           | 50 ± 16       | 60 ± 19      | 0.06     | 50 ± 16       | 45 ± 17      | 0.52     | 50 ± 16       | 51 ± 24       | 0.93     | 50 ± 16                     | 49 ± 5       | 0.63     | 50 ± 16       | 47 ± 10       | 0.34     |
| MDA (μmol/L)                            | 38 ± 13       | 35 ± 11      | 0.78     | 38 ± 13       | 31 ± 9       | 0.17     | 38 ± 13       | 35 ± 11       | 0.48     | 38 ± 13                     | 40 ± 7       | 0.57     | 38 ± 13       | 33 ± 10       | 0.16     |
| <b><u>Pro-oxidant enzymes</u></b>       |               |              |          |               |              |          |               |               |          |                             |              |          |               |               |          |
| XO (mmol/L/min)                         | 0.84 ± 0.16   | 0.86 ± 0.10  | 0.80     | 0.84 ± 0.16   | 0.90 ± 0.12  | 0.43     | 0.84 ± 0.16   | 0.84 ± 0.16   | 0.90     | 0.84 ± 0.16                 | 0.94 ± 0.11  | 0.11     | 0.85 ± 0.17   | 0.85 ± 0.14   | 0.98     |
| MPO (mmol/L/min)                        | 0.6 ± 0.7     | 0.6 ± 0.6    | 0.93     | 0.6 ± 0.7     | 0.3 ± 0.2    | 0.29     | 0.6 ± 0.7     | 0.4 ± 0.3     | 0.22     | 0.6 ± 0.7                   | 0.4 ± 0.4    | 0.40     | 0.6 ± 0.7     | 0.8 ± 0.9     | 0.37     |
| <b><u>Anti-oxidant enzymes</u></b>      |               |              |          |               |              |          |               |               |          |                             |              |          |               |               |          |
| MnSOD (mmol/L/min)                      | 10.3 ± 3.3    | 10.8 ± 2.5   | 0.64     | 10.4 ± 3.3    | 11.4 ± 2.5   | 0.47     | 10.4 ± 3.4    | 10.1 ± 2.7    | 0.74     | 10.4 ± 3.3                  | 8.2 ± 3.0    | 0.06     | 10.4 ± 3.4    | 10.1 ± 3.7    | 0.72     |
| Catalase (mmol/L/min)                   | 4.5 ± 2.2     | 5.0 ± 2.2    | 0.58     | 4.5 ± 2.2     | 4.0 ± 1.4    | 0.49     | 4.6 ± 2.2     | 4.2 ± 1.9     | 0.61     | 4.6 ± 2.2                   | 4.4 ± 2.2    | 0.86     | 4.6 ± 2.2     | 4.3 ± 1.7     | 0.50     |
| GPX (mmol/L/min)                        | 47.3 ± 36     | 72.6 ± 53.8  | 0.04     | 48.3 ± 39.0   | 40.1 ± 25.0  | 0.59     | 48.2 ± 37.1   | 45.8 ± 29.4   | 0.82     | 48.6 ± 37.1                 | 31.3 ± 14.0  | 0.19     | 48.0 ± 35.4   | 50.4 ± 59.2   | 0.81     |

AOPP: advanced oxidation protein products; MDA: malonedialdehyde; XO: xanthine oxidase; MPO: myeloperoxidase; MnSOD: manganese superoxide dismutase; GPX: glutathion peroxidase; n: number of patients. Mean values ± standard deviation.
