# Supplementary material for: Influence of Oxidative Stress Biomarkers and Genetic Polymorphisms on the Clinical Severity of Hydroxyurea-Free Senegalese Children with Sickle Cell Anemia
Source: MDPI journal article supplement (doi:10.3390/antiox9090863), 2020-09-14
Supplement: s1 [file s1]

**Supplemental data 1. Biomarkers of oxidative stress in SS children and AA controls.**

| Markers         | SS<br>(N = 301) | AA<br>(N = 25) | *p      |
|-----------------|-----------------|----------------|---------|
| AOPP (μmol/L)   | 50.1 ± 16.2     | 19.8 ± 15.3    | < 0.001 |
| MDA (μmol/L)    | 37.8 ± 13.1     | 11.3 ± 9.3     | < 0.001 |
| XO, mmol/L/min  | 0.80 ± 0.1      | 0.91 ± 0.2     | 0.01    |
| MPO, mmol/L/min | 0.6 ± 0.5       | 0.6 ± 0.5      | 0.7     |
| CAT, mmol/L/min | 4.5 ± 2.2       | 2.8 ± 1.8      | < 0.001 |
| GPX, mmol/L/min | 48.1 ± 36.8     | 70.1 ± 14.0    | < 0.001 |
| SOD, mmol/L/min | 10.4 ± 3.3      | 11.8 ± 3.5     | 0.04    |

AOPP: advanced oxidation protein products; MDA: malonedialdehyde; XO: xanthine oxidase; MPO: myéloperoxidase; CAT: catalase; GPX: glutathion peroxidase; SOD: superoxide dismutase; N: number of patients. Mean values ± standard deviation.
