# Supplementary material for: Influence of Oxidative Stress Biomarkers and Genetic Polymorphisms on the Clinical Severity of Hydroxyurea-Free Senegalese Children with Sickle Cell Anemia
Source: MDPI journal article supplement (doi:10.3390/antiox9090863), 2020-09-14
Supplement: s1 [file s1]

**Supplemental data 2: Biomarkers of oxidative stress and hemolytic index for the 301 patients with SCA according to the alpha-thalassemia genotype.**

|                                         | Alpha-thalassemia |               |               | p     |
|-----------------------------------------|-------------------|---------------|---------------|-------|
|                                         | Wild              | Het           | Mute          |       |
|                                         | n = 235           | n = 59        | n = 7         |       |
| <b><u>Oxidative stress products</u></b> |                   |               |               |       |
| AOPP (μmol/L)                           | 51 ± 16           | 48 ± 16       | 41 ± 18       | 0.18  |
| MDA (μmol/L)                            | 39 ± 14           | 34 ± 8        | 33 ± 9        | 0.03  |
| <b><u>Pro-oxidant enzymes</u></b>       |                   |               |               |       |
| XO (mmol/L/min)                         | 0.84 ± 0.16       | 0.85 ± 0.14   | 0.90 ± 0.57   | 0.58  |
| MPO (mmol/L/min)                        | 0.68 ± 0.78       | 0.38 ± 0.42   | 0.10 ± 0.8    | 0.003 |
| <b><u>Anti-oxidants enzymes</u></b>     |                   |               |               |       |
| Catalase (mmol/L/min)                   | 4.7 ± 2.3         | 4.1 ± 1.8     | 3.8 ± 3.0     | 0.13  |
| GPX (mmol/L/min)                        | 47.8 ± 36.1       | 51.2 ± 40.9   | 34.0 ± 12.5   | 0.48  |
| SOD (mmol/L/min)                        | 11.1 ± 3.4        | 11.0 ± 2.4    | 12.0 ± 1.2    | 0.11  |
| <b><u>Hemolysis index</u></b>           | 0.06 ± 1.06       | - 0.13 ± 0.72 | - 0.83 ± 0.58 | 0.035 |

AOPP: advanced oxidation protein products; MDA: malonedialdehyde; XO: xanthine oxidase; MPO: myeloperoxidase; GPX: glutathion peroxidase; SOD: superoxide dismutase; n: number of patients. Mean values +/- standard deviation.
